# Supplementary material for: Bayesian Spatial Models for Projecting Corn Yields
Source: MDPI journal article supplement (doi:10.3390/rs16010069), 2023-12-23
Supplement: s1 [file s1]

Archive with 1 entries (1 files):
- remotesensing-2666277-supplementary.pdf
